# Supplementary material for: Impact of Ready-Meal Consumption during Pregnancy on Birth Outcomes: The Japan Environment and Children’s Study
Source: MDPI journal article supplement (doi:10.3390/nu14040895), 2022-02-20
Supplement: s1 [file s1]

**Table S1. Association of perinatal abnormality and intake frequency of ready-cooked foods (Crude)**

|                                                                                        |                           | Stillbirth ( $\geq 12$ wk gestation) <sup>a</sup><br>n = 842 |                        | Pre-term birth ( $< 37$ wk gestation) <sup>b</sup><br>n = 4547 |                        | Small for gestational age infant<br>n = 6599 |                        | Low birth weight ( $< 2500$ g)<br>n = 7601 |                        |
|----------------------------------------------------------------------------------------|---------------------------|--------------------------------------------------------------|------------------------|----------------------------------------------------------------|------------------------|----------------------------------------------|------------------------|--------------------------------------------|------------------------|
|                                                                                        |                           | q-value                                                      | ORs<br>(95% CI)        | q-value                                                        | ORs<br>(95% CI)        | q-value                                      | ORs<br>(95% CI)        | q-value                                    | ORs<br>(95% CI)        |
| Ready-made meals<br>(cooked with microwave heating<br>in general)                      | $< \text{once a week}$    |                                                              | 1.000                  |                                                                | 1.000                  |                                              | 1.000                  |                                            | 1.000                  |
|                                                                                        | 1-2 times per week        | 0.000                                                        | 3.217<br>(2.371-4.364) | 0.000                                                          | 1.155<br>(1.08-1.234)  | 0.071                                        | 0.940<br>(0.888-0.995) | 0.461                                      | 1.029<br>(0.976-1.085) |
|                                                                                        | $\geq 3-7$ times per week | 0.000                                                        | 4.336<br>(2.633-7.138) | 0.754                                                          | 1.030<br>(0.916-1.158) | 0.811                                        | 0.986<br>(0.9-1.079)   | 0.527                                      | 1.040<br>(0.953-1.136) |
| Frozen meals<br>(cooked with microwave heating<br>in general)                          | $< \text{once a week}$    |                                                              | 1.000                  |                                                                | 1.000                  |                                              | 1.000                  |                                            | 1.000                  |
|                                                                                        | 1-2 times per week        | 0.000                                                        | 3.404<br>(2.633-4.4)   | 0.017                                                          | 1.108<br>(1.029-1.193) | 0.754                                        | 1.015<br>(0.956-1.078) | 0.144                                      | 1.054<br>(0.994-1.117) |
|                                                                                        | $\geq 3-7$ times per week | 0.000                                                        | 2.950<br>(1.934-4.498) | 0.195                                                          | 1.090<br>(0.98-1.213)  | 0.626                                        | 1.032<br>(0.947-1.125) | 0.525                                      | 1.039<br>(0.956-1.129) |
| Retort pouch foods<br>(heated with boiling water in<br>general)                        | $< \text{once a week}$    |                                                              | 1.000                  |                                                                | 1.000                  |                                              | 1.000                  |                                            | 1.000                  |
|                                                                                        | 1-2 times per week        | 0.000                                                        | 2.266<br>(1.801-2.851) | 0.004                                                          | 1.131<br>(1.05-1.219)  | 0.471                                        | 1.032<br>(0.97-1.098)  | 0.002                                      | 1.109<br>(1.047-1.176) |
|                                                                                        | $\geq 3-7$ times per week | 0.634                                                        | 0.708<br>(0.264-1.896) | 0.461                                                          | 0.878<br>(0.688-1.121) | 0.754                                        | 1.042<br>(0.868-1.251) | 0.172                                      | 1.154<br>(0.975-1.364) |
| Convenience foods in plastic<br>container<br>(heated with boiling water in<br>general) | $< \text{once a week}$    |                                                              | 1.000                  |                                                                | 1.000                  |                                              | 1.000                  |                                            | 1.000                  |
|                                                                                        | 1-2 times per week        | 0.000                                                        | 2.369<br>(1.783-3.147) | 0.005                                                          | 1.132<br>(1.049-1.223) | 0.340                                        | 1.044<br>(0.977-1.115) | 0.024                                      | 1.083<br>(1.019-1.151) |
|                                                                                        | $\geq 3-7$ times per week | 0.598                                                        | 0.742<br>(0.348-1.583) | 0.754                                                          | 0.953<br>(0.769-1.18)  | 0.804                                        | 0.969<br>(0.811-1.157) | 0.842                                      | 1.022<br>(0.868-1.203) |
| Canned foods<br>(without heating in general)                                           | $< \text{once a week}$    |                                                              | 1.000                  |                                                                | 1.000                  |                                              | 1.000                  |                                            | 1.000                  |
|                                                                                        | 1-2 times per week        | 0.129                                                        | 1.516<br>(0.97-2.368)  | 0.004                                                          | 1.212<br>(1.079-1.362) | 0.862                                        | 0.989<br>(0.893-1.095) | 0.090                                      | 1.100<br>(1.002-1.207) |
|                                                                                        | $\geq 3-7$ times per week | NA                                                           | NA<br>NA               | 0.451                                                          | 0.714<br>(0.391-1.305) | 0.804                                        | 0.925<br>(0.593-1.443) | 0.936                                      | 0.979<br>(0.65-1.475)  |
| Beverage (can or plastic bottle)                                                       | $< 7$ times per week      |                                                              | 1.000                  |                                                                | 1.000                  |                                              | 1.000                  |                                            | 1.000                  |
|                                                                                        | 7-13 times per week       | 0.000                                                        | 5.312<br>(4.042-6.981) | 0.001                                                          | 1.140<br>(1.062-1.224) | 0.753                                        | 0.984<br>(0.928-1.043) | 0.037                                      | 1.069<br>(1.012-1.13)  |
|                                                                                        | $\geq 14$ times per week  | 0.000                                                        | 4.176<br>(2.671-6.527) | 0.000                                                          | 1.360<br>(1.227-1.507) | 0.027                                        | 1.122<br>(1.026-1.227) | 0.000                                      | 1.187<br>(1.092-1.291) |
| Beverage (coffee bean or tea leaf)                                                     | $< 7$ times per week      |                                                              | 1.000                  |                                                                | 1.000                  |                                              | 1.000                  |                                            | 1.000                  |
|                                                                                        | 7-13 times per week       | 0.000                                                        | 4.811<br>(3.79-6.107)  | 0.020                                                          | 1.104<br>(1.026-1.188) | 0.005                                        | 1.101<br>(1.037-1.169) | 0.021                                      | 1.078<br>(1.019-1.141) |
|                                                                                        | $\geq 14$ times per week  | 0.008                                                        | 1.799<br>(1.236-2.62)  | 0.754                                                          | 0.981<br>(0.899-1.07)  | 0.000                                        | 1.155<br>(1.079-1.236) | 0.471                                      | 1.034<br>(0.968-1.103) |

The odds ratio was calculated with the data complemented by the multiple imputation method. <sup>a</sup> Early miscarriage ( $< 12$  weeks' gestation) and artificial abortion were excluded from analyses. <sup>b</sup> Miscarriage and artificial abortion were excluded from analyses.
